# Supplementary material for: Differential effect of Platelet Endothelial Cell Adhesion Molecule-1 (PECAM-1) on leukocyte infiltration during contact hypersensitivity responses
Source: PeerJ journal article supplement (doi:10.7717/peerj.3555), 2017-07-10
Supplement: Ears4Skin2-4notes.pdf [file Ears4Skin2-4notes.pdf]

A      U      C      E      D/F

| CD4+ T | CD8+ T | CD19+ B | NK/NK T               | Monocyte/DC           | Color              |
|--------|--------|---------|-----------------------|-----------------------|--------------------|
| CD3    | CD3    | CD3 (-) | CD3                   |                       | APC CY7            |
| CD4    | CD8    | CD19    | CD8                   | CD11c <del>out!</del> | PE CY5             |
| CD44   | CD44   | CD5     | $\gamma\delta$ T cell | CD115 - PE            | FITC               |
| CD62L  | CD62L  | CD62L   |                       | CD11b <del>APC</del>  | APC                |
|        |        |         |                       | GR1 <del>APC</del>    | PE Cy7             |
| FoxP3  |        |         | DX5<br>(CD49b)        |                       | PE                 |
|        |        | IgD PE  |                       | CD206-biotin          | <del>PE</del> FITC |
|        |        |         | CD1d                  | PE-Cy7                | APC                |
|        |        |         |                       |                       | PE Cy7             |

*Intracellular staining for ~~BrdU~~ and FoxP3*

Cells were surface stained as described, washed, and then fixed for 5 min at 37° C in 4% paraformaldehyde. Cell suspensions were then permeabilized by incubating in PBS containing 0.1% Triton X-100 for 1 h on ice. For detection of BrdU incorporation, permeabilized cells were incubated for 10 min at 37° C in RPMI 1640 containing recombinant DNase. Afterward, suspensions were washed in PBS and incubated on ice for 40 min with anti-BrdU Abs following the manufacturer's protocol. Suspensions were washed and then incubated overnight with anti-FoxP3 Abs in PBS containing 0.5% BSA and analyzed the following day by flow cytometry. For FoxP3 staining only, the BrdU relevant steps were omitted.

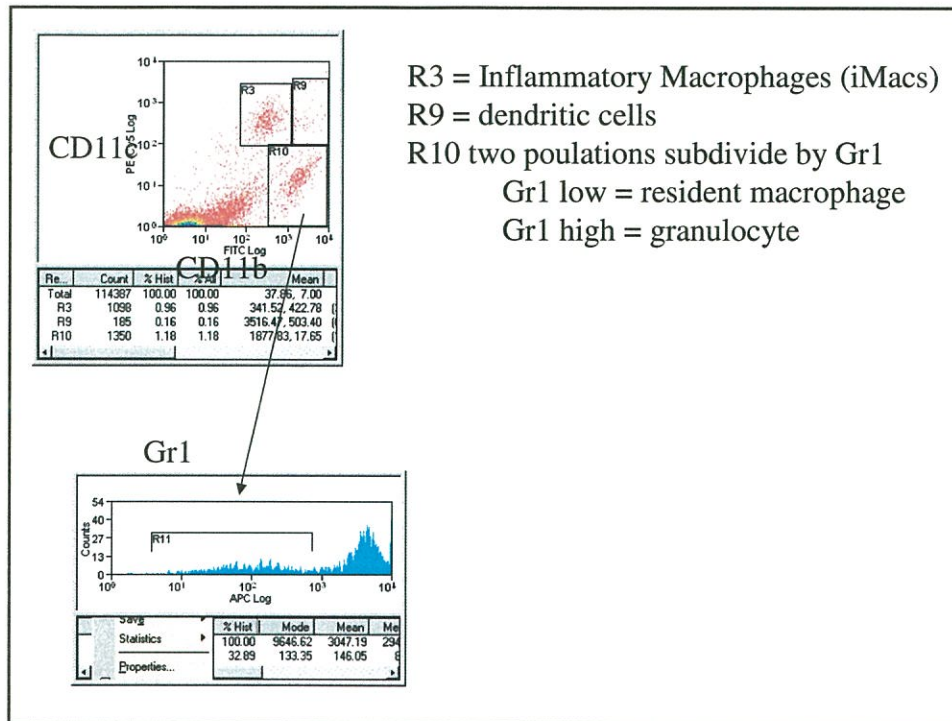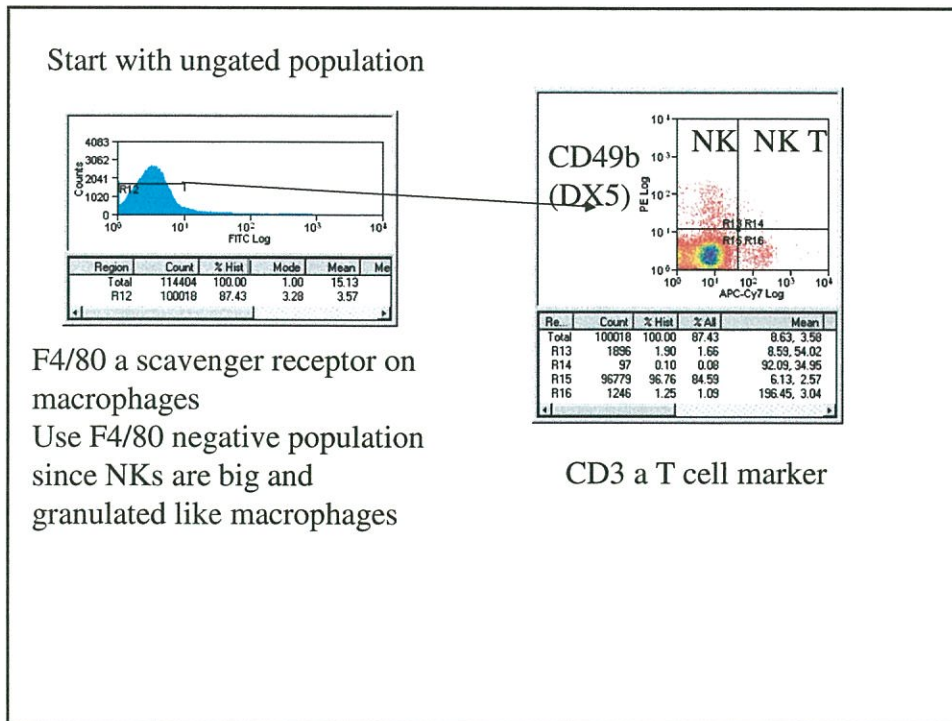

Mice were euthanized and the pulmonary cavities were opened. After severing the descending aorta, the blood in the lungs was cleared by perfusion through the right heart with 5 ml of PBS containing 50 U of heparin (Sigma- Aldrich, St. Louis, MO) per ml until the lungs and liver became pale. Using an 18-gauge gavage needle, the trachea was cannulated, and 1 ml of PBS was slowly injected into the lungs and then withdrawn.

To obtain lung cell populations, the lungs were aseptically removed and minced. One lobes was saved and fixed in 1% paraformaldehyde/PBS for histology and immunohistochemistry. The remaining lobes were incubated in RPMI 1640 (Life Technologies, Gaithersburg, MD) containing collagenase XI (0.7 mg/ml; Sigma-Aldrich) and type IV bovine pancreatic DNase (30 mg/ml; Sigma-Aldrich) during 30-45 min at 37°C.

The action of the enzymes was stopped by adding 10 ml of RPMI medium containing 10% FBS, and digested lungs were further disrupted by gently pushing the tissue through a nylon screen (70 µm). The single-cell suspension was then washed and centrifuged at 200g. To lyse contaminating RBCs, the cell pellet was incubated during 30 seconds room temperature with 1.8 ml ddH<sub>2</sub>O, then mixed with 200ul 10X PBS.

*Intracellular staining for FoxP3*

Cells were surface stained as described, washed, and then fixed for 5 min at 37° C in 4% paraformaldehyde. Cell suspensions were then permeabilized by incubating in PBS containing 0.1% Triton X-100 for 1 h on ice. Suspensions were washed and then incubated overnight with anti-FoxP3 Abs in PBS containing 0.5% BSA and analyzed the following day by flow cytometry.

*no Gobin*

|            |                            |                   |
|------------|----------------------------|-------------------|
|            | <i>mp</i>                  |                   |
| CD4-PE-Cy5 | Collc PE-Cy5 PE-Cy7 ✓      |                   |
| CD4-FITC   | CD206 <u>biotin SA APC</u> | APC?              |
| CD206-APC  | Colls - <del>APC</del> APC | APC               |
| FoxP3-PE   | CD115-PE                   | APC               |
|            | Grl <del>APC</del> APC     | <del>PE-Cy7</del> |

4x, PF in PBS

PBS + 0.1% Triton

PBS + 0.5% BSA

RPMI + Collagen / DNase

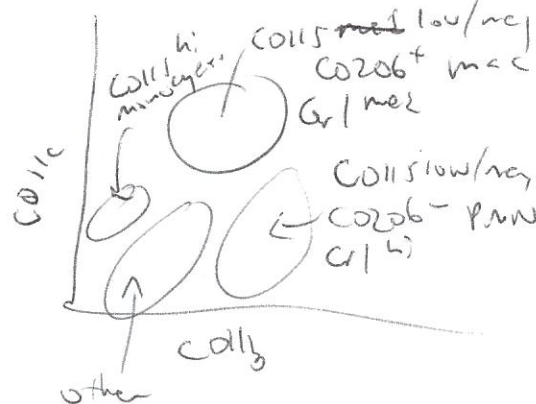

Stich reanalysis 3/2/01

| CO2 <sup>-</sup> , CO2 <sup>+</sup> , CO2 <sup>8</sup> | CO2 <sup>-</sup><br>other CO2 <sup>+</sup> | CO2 <sup>+</sup> |
|--------------------------------------------------------|--------------------------------------------|------------------|
|--------------------------------------------------------|--------------------------------------------|------------------|

|    |     |  |
|----|-----|--|
| 1  | .03 |  |
| 2  | .5  |  |
| 3  | .4  |  |
| 4  | .64 |  |
| 5  | .73 |  |
| 6  | .46 |  |
| 7  | .65 |  |
| 8  | .49 |  |
| 9  | .27 |  |
| 10 | .17 |  |



3/20/08 Reanalyzed

|                          |              | residual<br>macs     | PMP &<br>monocyte/mac                              | OC                                   |       |
|--------------------------|--------------|----------------------|----------------------------------------------------|--------------------------------------|-------|
| Autofluorescence gate    |              | 11c/11b <sup>L</sup> | 11c <sup>10</sup> /11b <sup>11</sup> <u>Count*</u> | 11b <sup>10</sup> /11c <sup>11</sup> | Co206 |
| WT1 66543 #1             | 1.1          | <del>46.5</del> 34   | <del>34</del> 46.5                                 | 2.5                                  | 0.5   |
| WT2 " #2                 | 0.6          | <del>35</del> 26     | <del>26</del> 35                                   | 1.5                                  | 0.2   |
| WT3 " #3                 | 7.6          | <del>35</del> 10     | <del>50</del> 35                                   | 4                                    | 5.3   |
| WT4 " #4                 | <u>30???</u> | <del>57</del> 27     | <del>37.7</del> 57                                 | 3.2                                  | 17    |
| WT5 85548M tumor         | 30??         | <del>34</del> 16     | <del>46</del> 24                                   | 2.7                                  | 20    |
| U-1 58048 F will         | 5.6          | <del>46</del> 60.2   | <del>60.2</del> 16                                 | 5                                    | 4.5   |
| U-2 68546 M will         | 1.8          | 32                   | 37                                                 | 1.8                                  | 0.16  |
| U-3 70087 M/F (moderate) | 0.9          | 80                   | 3.5                                                | 2.0                                  | 0.25  |
| U-4 70087 F/M (low)      | 0.6          | 75                   | 10                                                 | 0.9                                  | 1.1   |
| U-5 88805 will           | 0.5          | 16                   | 25                                                 | 3.6                                  | 0.4   |

histology → relatively little to be seen  
 70087 M + F have a few early  
 lesions  
 other three are healthy

2/2/58 sum

~~APC~~  
APC+  
~~PC++~~

88- 085-  
APC-CYT+, PC5-  
CO3+

Other crop  
pos for everything

APC ++, PC ++

|    |      |      |      |
|----|------|------|------|
| 1  | 0    | 0.17 | 1.2  |
| 2  | 0.17 | 1.8  | 2.9  |
| 3  | .13  | 0.8  | 1.7  |
| 4  | 0.14 | 0.7  | 2.1  |
| 5  | 0.21 | 1    | 4    |
| 6  | .07  | 0.5  | 2.9  |
| 7  | .017 | 1.2  | 4.9  |
| 8  | .09  | 0.75 | 2.08 |
| 9  | 0.04 | 0.42 | 2.1  |
| 10 | .02  | 0.37 | 1.15 |



NK skin re-enclyr photos

- CD11 tetramer - APC

-  $\gamma\delta$  FITC

- CD8 APC-Cy7

- CD8 PE-Cy5

- OX40 - PE

What do we see?

① a population that is

bright on all channels

FITC  $\gamma\delta$

PE-Cy5 CD8

APC costar cold<sup>+</sup>?

~~OX40~~ PE OX40

w/ lung

② 2 purple populations

CD8 - PE-Cy5 (-)

cold<sup>+</sup> or - APC (+) + (-)

OX40 ~~costar~~ PE (-)

$\gamma\delta$  (-)

③ ~~costar~~ OX40<sup>+</sup>, cold<sup>-</sup>

CD8<sup>-</sup>, CD8<sup>-</sup>

$\gamma\delta$  ~~exp~~

+ + (-)

2 populations?

C/2008 Analysis Meas/DCs

| WNG | Gate | first                                | on                                   | auto                                 | fluorescent                          | cells                                |                    |
|-----|------|--------------------------------------|--------------------------------------|--------------------------------------|--------------------------------------|--------------------------------------|--------------------|
|     | ↓    | 11c <sup>hi</sup> /d15 <sup>lo</sup> | 11c <sup>hi</sup> /d15 <sup>lo</sup> | 11c <sup>hi</sup> /d15 <sup>lo</sup> | 11c <sup>hi</sup> /d15 <sup>lo</sup> | 11c <sup>hi</sup> /d15 <sup>lo</sup> | CD206 <sup>+</sup> |
| WT1 | 1.3  | 52                                   | 34                                   | 100%                                 | 4                                    | 4                                    | 1                  |
| WT2 | 1.4  | 62                                   | 23                                   | 100%                                 | 4                                    | 4                                    | 1                  |
| WT3 | 1.6  | 55                                   | 30                                   | 4                                    | 4                                    | 3.4                                  | P.2                |
| WT4 | 2.6  | 64                                   | 19                                   | 4                                    | 4                                    | 2.8                                  | 1                  |
| WT5 | 2.7  | 60                                   | 23                                   | 4                                    | 4                                    | 4.2                                  | 2                  |
| K01 | 17   | 87                                   | 1.4                                  | 4                                    | 4                                    | 2.8                                  | 10.4               |
| K02 | 2    | 83                                   | 8.4                                  | 4                                    | 4                                    | 2.2                                  | 2                  |
| K03 | 2    | 48                                   | 38                                   | 4                                    | 4                                    | 3.7                                  | 5.5                |
| K04 | 6.6  | 87                                   | 3                                    | 4                                    | 4                                    | 4                                    | 3.2                |
| K05 | 9.6  | 89                                   | 0.7                                  | 4                                    | 4                                    | 0.7                                  | 5.3                |

higher skin

SKIN UNCHANGED DUE TO KERATINOCYTE AUTO FLUORESCENCE

↓ VCR prominent

|     |     |      |      |     |
|-----|-----|------|------|-----|
| WT1 | 3.6 | 1.6  | 3.5  | N/A |
| WT2 | 2.2 | 0.8  | 1.9  |     |
| WT3 | 0.5 | 0.05 | 0.4  |     |
| WT4 | 2.3 | 0.25 | 0.6  |     |
| WT4 | 2.2 | 0.27 | 0.9  |     |
| K01 | 6.3 | 0.07 | 0.3  |     |
| K02 | 1   | 0.07 | 0.2  |     |
| K03 | 0.7 | 0.07 | 0.3  |     |
| K04 | 0.9 | 0.09 | 0.13 |     |
| K05 | 0.8 | 0.05 | 0.2  |     |

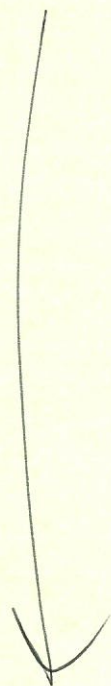



6/19/08

skin DMFB Jan 3

|      | $\gamma\delta^+, \text{CD1}^-$ | $\gamma\delta^+ \text{CD1}^+$ | $\text{DX}\gamma^+, \text{CD1}^-$ | $\text{DX}\gamma^+, \text{CD1}^+$ |
|------|--------------------------------|-------------------------------|-----------------------------------|-----------------------------------|
| WT1  | 10                             | 1                             | 13                                | 15                                |
| WT2  | 10                             | 3                             | 14                                | 10                                |
| WT3  | 6                              | 1                             | 7                                 | 2                                 |
| WT4  | 7                              | 1                             | 6                                 | 14                                |
| WT5  | 9.5                            | 3                             | 11                                | 12                                |
| Ko 1 | 2                              | 0                             | 2                                 | 1                                 |
| Ko 2 | 1                              | 0.5                           | 6.4                               | 3.7                               |
| Ko 3 | 2                              | 1                             | 3                                 | 3                                 |
| Ko 4 | 2                              | 1                             | 2                                 | 8                                 |
| Ko 5 | 1.5                            | 1.5                           | 1.6                               | 1                                 |

| 88 analysis |                   | used SKM p 2. plo<br>3/20/08 + 6/19/08 |                | used SKM p 2. plo<br>costs |                | <del>max costs</del> |
|-------------|-------------------|----------------------------------------|----------------|----------------------------|----------------|----------------------|
| 3/20/08     | con?<br>n/d       | 88                                     | INKT           | CO8                        | NK             |                      |
| WT1         |                   | <del>3.7</del>                         | 0.02           | 0.13                       | 0.19           |                      |
| WT2         |                   | 5.7                                    | 0.26           | 2.8                        | 2              |                      |
| WT3         |                   | 4.3                                    | 0.06           | 0.85                       | 6.7            |                      |
| WT4         |                   | 6.3                                    | 0.04           | 0.5                        | 6.1            |                      |
| WT5         |                   | 10.6                                   | 0.1            | 1.1                        | 2.3            |                      |
| K01         |                   | 4                                      | 0.05           | 0.8                        | 1.35           |                      |
| K02         |                   | 5.3                                    | 0.14           | <del>1.75</del>            | 3.5            |                      |
| K03         |                   | 4.9                                    | 0.09           | 0.6                        | 2              |                      |
| K04         |                   | 2.5                                    | 0.05           | 0.6                        | 1.1            |                      |
| K05         |                   | 2.2                                    | 0.04           | 0.25                       | 1.1            |                      |
| 6/19/08     |                   |                                        |                |                            |                |                      |
| WT1         | <del>100.00</del> | 7                                      | 0.87           | <del>1.6</del>             | <del>1.0</del> | <del>1.0</del>       |
| WT2         | <del>0.5</del> 13 | <del>4</del>                           | 0.10           | <del>0.67</del>            | <del>1.5</del> | 0.9                  |
| WT3         | 0.07              | <del>4</del>                           | 0.05           | <del>0.2</del>             | 0.9            | 0.9                  |
| WT4         | 0.3               | <del>5.3</del>                         | 0.25           | 0.25                       | <del>1.5</del> | 0.4                  |
| WT5         | <del>0.03</del>   | 8.5                                    | 0.10           | <del>0.3</del>             | <del>1.4</del> | 0.7                  |
| K01         | 0.1               | 2.6                                    | 0.02           | 0.03                       | 0.2            |                      |
| K02         | 0.2               | 1.3                                    | 0.03           | 0.16                       | 0.2            |                      |
| K03         | 0.1               | 2.5                                    | 0.05           | 0.08                       | 0.5            |                      |
| K04         | 0.4               | 1.5                                    | 0.05           | 0.14                       | 0.16           |                      |
| K05         | n/d               | 2.9                                    | <del>1.0</del> | <del>1.0</del>             | 0.6            |                      |



6/20/08 COY FXPJ Analysis

→ APC @ 9000 but still too low

generally, it appears FXPJ<sup>+</sup> are also COYT

|     | COYT (of total) | COYT, FXPJ <sup>+</sup> (of total) | % of COYT |
|-----|-----------------|------------------------------------|-----------|
| WT1 | 18 15           | 1.8 2.5                            | 17        |
| WT2 | 18              | 1.8                                | 10.7      |
| WT3 | 14.3            | 1.2                                | 8.5       |
| WT4 | 20.0            | 1.4                                | 6.9       |
| WT5 | 12.1            | 1.6                                | 12.8      |
| U01 | 6               | 1.8                                | 31        |
| U02 | 13              | 1.3                                | 10        |
| U03 | 9.0             | 0.7                                | 7.4       |
| U04 | 6.1             | 1.6                                | 27        |
| U05 | 8.6             | 0.7                                | 12.2      |

8/14/08 digest 0.7mg/ml Chloram x1 + 0.7 $\mu$  Type 2

x5 x/ml

|     |      |     |
|-----|------|-----|
| W1L | 2e4  | 1e5 |
| W1R | 10e4 |     |
| W2L | 2e4  |     |
| W2R | 4e4  |     |
| W3L | 4e4  |     |
| W3R | 10e4 |     |
| W4L | 1e4  |     |
| W4R | 4e4  |     |
| W5L | 6e7  |     |
| W5R | 12e4 | 10  |
| K1L | 1e7  |     |
| K1R | 2e7  |     |
| K2L | 5e4  |     |
| K2R | 2e7  |     |
| K3L | 2e4  |     |
| K3R | 4e4  |     |
| K4L | 2e4  |     |
| K4R | 3e7  |     |
| K5L | 1e4  |     |
| K5R | 2e7  |     |

L → NA/88 only

R → hope we have enough to see 1e5/tube

- A - COM Peptide Blue / COM ATC / COM L APC
  - B COM " " / " " / " "
  - C 88 ATC / COM APC / OXS PE / MARGO PE 47
  - D COM Peptide Blue / COM ATC / COM APC / COM PE
- 10 tubes exact C = 20  
 1mg 2mg



12/22/08

|        |        |         |                       |              |              |
|--------|--------|---------|-----------------------|--------------|--------------|
| CD4+ T | CD8+ T | CD19+ B | NK/NK T               | Monocyte/DC  | Color        |
| CD3    | CD3    | CD3 (-) | CD3                   |              | APC CY7      |
|        |        |         |                       |              | PE CY5       |
| CD4    | CD8    | CD19    | CD8                   | CD11c        | Pacific Blue |
| CD44   | CD44   | CD5     | $\gamma\delta$ T cell | CD11b        | FITC         |
| CD62L  | CD62L  | CD62L   | CD1d                  | GR1          | APC          |
|        |        |         |                       | CD206-biotin | PE Cy7       |
| FoxP3  |        | IgD     | DX5<br>(CD49b)        | CD115        | PE           |
|        |        |         |                       |              |              |

*Handwritten notes:*  
 NK62Lish  
 not flow

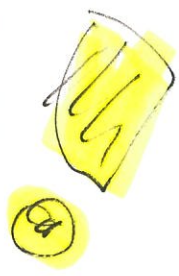

*Intracellular staining for FoxP3*

Cells were surface stained as described, washed, and then fixed for 5 min at 37° C in 4% paraformaldehyde. Cell suspensions were then permeabilized by incubating in PBS containing 0.1% Triton X-100 for 1 h on ice. Suspensions were washed and then incubated overnight with anti-FoxP3 Abs in PBS containing 0.5% BSA and analyzed the following day by flow cytometry.

*Handwritten:* d10

*Handwritten:* 16 samples

- 1% PF in PBS 15' RT
  - WASH 1x PBS + BSA
  - Permeabiliz. in 0.1% saponin in PBS 30' RT
  - Opn in 0.1% saponin / PBS / BSA @ 4° C
- Handwritten:* FoxP3

12/22/08

One lobe

rod

WT1

WT2

WT3

WT4

WT5

50 mL

Skin

5x10<sup>4</sup>

4

Lung

10x10<sup>4</sup>

30

2e6

300

14

200

2e7

50

6

100

1e7

100

4

~~from 100~~ 80 8e<sup>6</sup> 100

12

~~80~~ 50 5e6 200

K01 70087

97.7%

3

80

8e6

1e5

K02 78640

90.1%

6

80

K03 72790

85%

5

100

K04 75875

~~77%~~ 70% 100

100

K05 74890

~~77%~~ 77% 100

60

10 petri dishes ✓

20 tubes for flow to ear, 10 lungs

+ 6 spleen

+ 4 blood

30 total ✓

30 flow Tubes

|        |      | 10x10 <sup>4</sup> |                   |
|--------|------|--------------------|-------------------|
| Spleen | WT 1 | 33                 | 2e <sup>6</sup>   |
|        | WT 2 | 90                 | 9e <sup>6</sup>   |
|        | WT 3 | 90                 | 9e <sup>6</sup>   |
|        | K0 1 | 70                 | 7e <sup>6</sup>   |
|        | K0 2 | 120                | 1.2e <sup>7</sup> |
|        | K0 3 | 40                 | 2e <sup>6</sup>   |

- FoxP3 protocol from Tokun

- Collagenase for lungs + skin

15 tubes for K0 mice

① BAC

② IHC

③ RNA

} mouse ID #  
date  
FKO

15 mL conical

(20) 50 mL conicals



ONFB combined  
 For analysis II

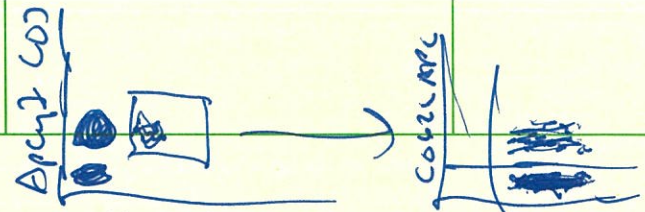

|    | CO4  | A   | CON PER 45 | C   | CON PER 15 |
|----|------|-----|------------|-----|------------|
| w1 | 5.4  | 3   | 50         | 0   | 47         |
| w2 | 11.1 | 1   | 50         | 0.3 | 49         |
| w3 | 7.8  | 0.4 | 50         | 0   | 50         |
| w4 | 16.4 | 6.6 | 42         | 0.3 | 57         |
| w5 | 9.6  | 0.9 | 34         | 0.8 | 64         |
| k1 | 9    | 0.7 | 31         | 1.3 | 67         |
| k2 | 4.9  | 1.4 | 42         | 1.5 | 55         |
| k3 | 10.1 | 6.4 | 36         | 0.8 | 63         |
| k4 | 11   | 6.5 | 21         | 2.5 | 76         |
| w1 | 23   | 0   | 3          | 3   | 94         |
| w2 | 24   | 0.3 | 4          | 3   | 93         |
| w3 | 11   | 0.8 | 5          | 4   | 91         |
| w4 | 21   | 1.6 | 14         | 7   | 77         |
| w5 | 7.5  | 2.3 | 12         | 3.2 | 78         |
| w6 | 26.8 | 0   | 16         | 0.4 | 84         |
| k1 | 14   | 0.3 | 19         | 1.6 | 80         |
| k2 | 15   | 0.2 | 9          | 0.9 | 90         |
| k3 | 7.5  | 0.8 | 12         | 1.0 | 77         |
| k4 | 8.8  | 0.1 | 14         | 1.1 | 85         |
| k5 | 9.2  | 0.4 | 12         | 1.2 | 87         |
